# Supplementary material for: Mixed azide and carboxylate bridged trinuclear Mn(ii) and Co(ii) motifs in coordination ladders: structures and magnetism
Source: Royal Society of Chemistry journal article supplement (doi:10.1039/c2ra21173d), 2012-01-01
Supplement: c2ra21173d.pdf [file c2ra21173d.pdf]

## Supporting Information

### Mixed azide and carboxylate bridged trinuclear Mn(II) and Co(II) motifs in coordination ladders: structures and magnetism

Yan-Qin Wang, Ai-Ling Cheng, Xuan Wang and En-Qing Gao\*

Table S1. Hydrogen bond lengths [ $\text{\AA}$ ] and bond angles [ $^\circ$ ] for **1**

| D-H...A                    | D-H   | H...A | D-H...A | D...A |
|----------------------------|-------|-------|---------|-------|
| O5-H5W1... O4 <sup>a</sup> | 0.815 | 2.000 | 155.43  | 2.763 |
| O5-H5W2... N7 <sup>b</sup> | 0.778 | 2.143 | 175.69  | 2.919 |
| O6-H6W1... O4 <sup>c</sup> | 0.854 | 1.913 | 172.32  | 2.762 |
| O6-H6W2... N6 <sup>d</sup> | 0.879 | 1.963 | 174.50  | 2.838 |

Symmetry codes: a: x, y-1, z+1; b: -x+1, -y, -z+1; c: -x+1, -y+1, -z; d: -x, -y, -z+1

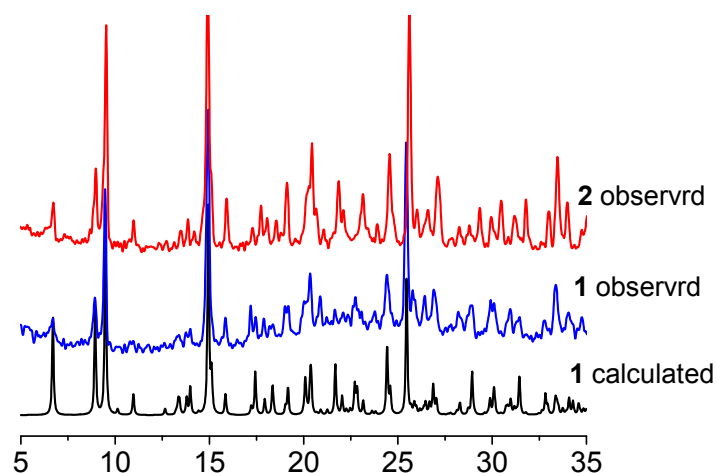

Figure S1. The XRD patterns calculated from the single crystal data of **1** and observed for **1** and **2**.

Table S2. Relevant data for the unit cell refinement of **1**

| H  | K  | L | $2\theta_{\text{obsd}}/^\circ$ | $2\theta_{\text{Calcd}}/^\circ$ | difference/ $^\circ$ |
|----|----|---|--------------------------------|---------------------------------|----------------------|
| 0  | 0  | 1 | 6.7294                         | 6.7025                          | 0.0269               |
| 0  | -1 | 0 | 8.9723                         | 8.9771                          | -0.0048              |
| 0  | -1 | 1 | 9.5303                         | 9.5355                          | -0.0052              |
| -1 | 0  | 1 | 10.9944                        | 10.9671                         | 0.0273               |
| 0  | 1  | 1 | 12.7243                        | 12.6699                         | 0.0544               |
| 1  | -1 | 0 | 13.1171                        | 13.0494                         | 0.0677               |
| 0  | 0  | 2 | 13.4879                        | 13.4281                         | 0.0598               |
| 0  | -1 | 2 | 13.8653                        | 13.8451                         | 0.0202               |
| -1 | 1  | 1 | 14.9247                        | 14.9394                         | -0.0147              |
| -1 | -1 | 2 | 15.9257                        | 15.9163                         | 0.0094               |
| 0  | -2 | 1 | 17.2984                        | 17.3113                         | -0.0129              |
| 0  | -2 | 0 | 18.0776                        | 18.0098                         | 0.0678               |
| 0  | -2 | 2 | 19.1271                        | 19.1379                         | -0.0108              |
| 0  | 0  | 3 | 20.1716                        | 20.2005                         | -0.0289              |
| -1 | -1 | 3 | 20.4494                        | 20.4656                         | -0.0162              |
| -1 | 0  | 3 | 20.7184                        | 20.7217                         | -0.0033              |
| -1 | -2 | 2 | 21.0773                        | 21.0175                         | 0.0598               |
| -2 | -1 | 1 | 21.8609                        | 21.8344                         | 0.0265               |
| -1 | 2  | 1 | 22.1419                        | 22.1555                         | -0.0136              |
| 2  | -1 | 1 | 23.1466                        | 23.1210                         | 0.0256               |
| -1 | -2 | 3 | 23.9265                        | 23.9420                         | -0.0155              |
| -1 | 1  | 3 | 24.5681                        | 24.5996                         | -0.0315              |
| 2  | 1  | 1 | 25.6201                        | 25.6795                         | -0.0594              |
| -1 | -1 | 4 | 26.0317                        | 26.0473                         | -0.0156              |
| 0  | -3 | 2 | 26.5949                        | 26.6172                         | -0.0223              |
| 0  | 3  | 0 | 27.1480                        | 27.1571                         | -0.0091              |
| -1 | -3 | 2 | 28.2585                        | 28.2633                         | -0.0048              |
| 1  | -3 | 2 | 28.7905                        | 28.8184                         | -0.0279              |
| -2 | -1 | 4 | 29.9577                        | 29.9695                         | -0.0118              |
| -1 | 3  | 1 | 30.4883                        | 30.4999                         | -0.0116              |
| 2  | 2  | 1 | 31.2089                        | 31.2113                         | -0.0024              |
| -3 | -1 | 2 | 31.8024                        | 31.8124                         | -0.0100              |
| -1 | -3 | 4 | 33.0165                        | 33.0058                         | 0.0107               |
| -1 | 0  | 5 | 33.4725                        | 33.4666                         | 0.0059               |
| 0  | 0  | 5 | 34.0058                        | 33.9896                         | 0.0162               |

Mean square deviation:  $(\sum (2\theta_{\text{obsd}} - 2\theta_{\text{calcd}})^2 / N_{\text{ref}})^{1/2} = 0.0301$

( $N_{\text{ref}}$  is the number of the peaks used in the refinement)
